# Supplementary material for: V–P–O compound encapsulated palladium nanoparticles supported on carbon nanotubes as a methanol-tolerant oxygen reduction electrocatalyst
Source: Royal Society of Chemistry journal article supplement (doi:10.1039/c6ra00937a), 2016-01-01
Supplement: c6ra00937a1.pdf [file c6ra00937a1.pdf]

### Supplementary information

V-P-O compound encapsulated palladium nanoparticles supported on carbon  
nanotubes as methanol-tolerant oxygen reduction electrocatalyst

Haijing Liu, Jianming Bao, Jingjun Liu, Meiling Dou, and Feng Wang\*

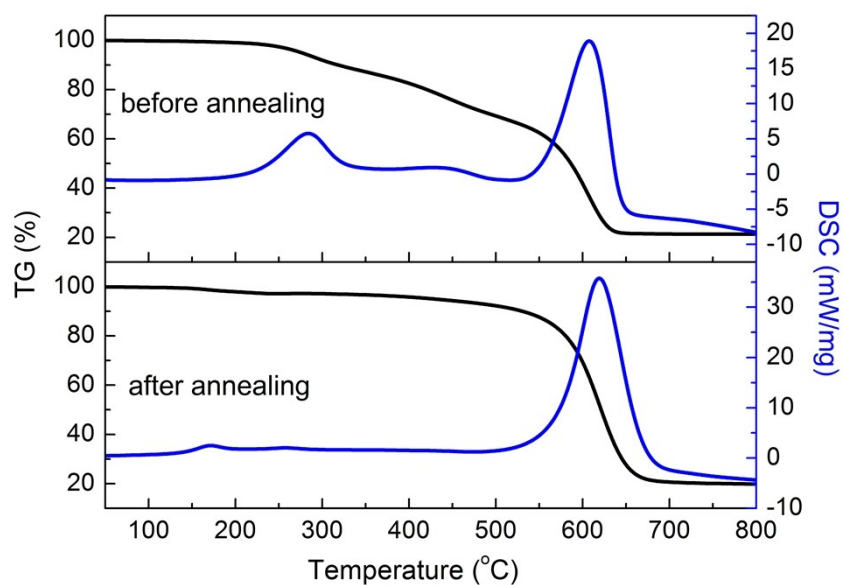

Fig. S1 Thermogravimetric and Differential Thermal Analysis curves of Pd@V-P-O/CNT before and after annealing.

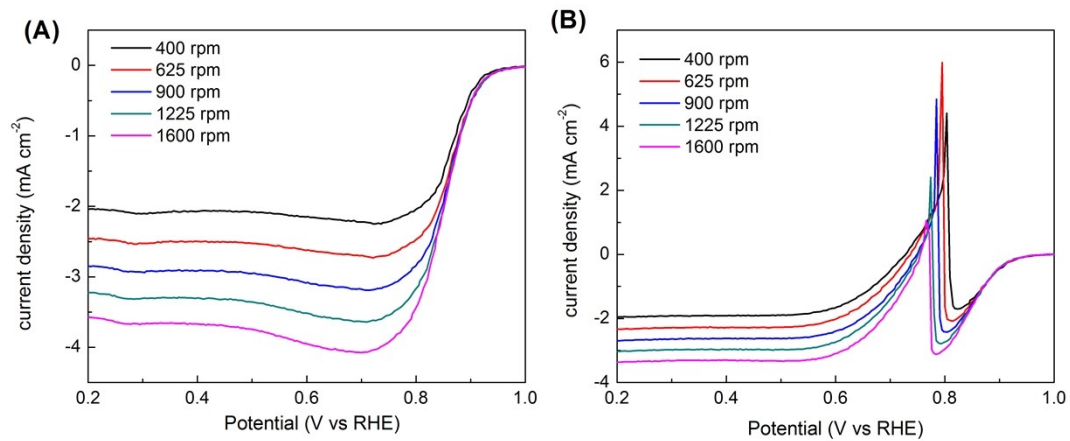

Fig. 2 Polarization curves of the Pd/CNT in 0.1 mol/L KOH solution saturated with O<sub>2</sub> at a scan rate of 5 mV/s (A) without and (B) with 1.0 mol/L methanol.

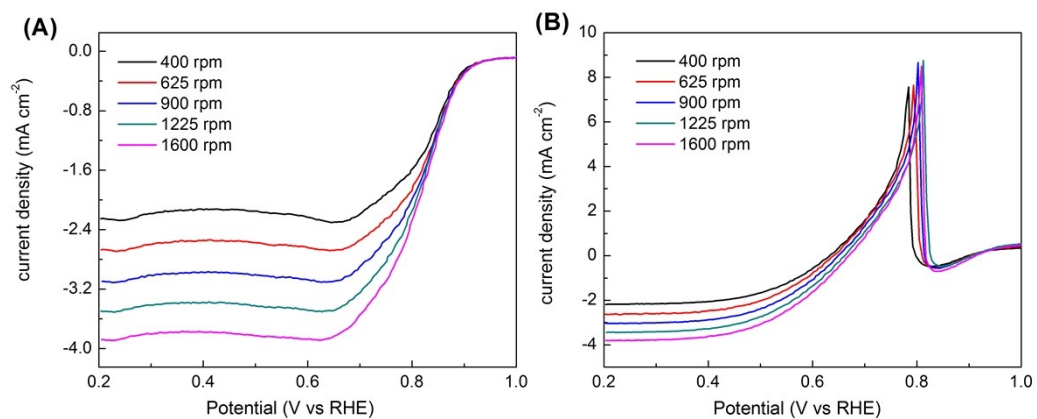

Fig. 3 Polarization curves of the commercial Pd/C in 0.1 mol/L KOH solution saturated with O<sub>2</sub> at a scan rate of 5 mV/s (A) without and (B) with 1.0 mol/L methanol.
